# Supplementary material for: A Comparative Study of the Synthesis and Hydrolysis of sym-Triaminobenzene Homologues
Source: MDPI journal article supplement (doi:10.3390/molecules27238595), 2022-12-06
Supplement: s1 [file s1]

# **A Comparative Study of the Synthesis and Hydrolysis Processes of *sym*-Triaminobenzene Homologues**

Irina A. Shchurova\*, Natalia A. Alekseyeva, Sergey V. Sysolyatin  
and Valeriy V. Malykhin

*Institute for Problems of Chemical and Energetic Technologies, Siberian Branch of the  
Russian Academy of Sciences (IPCET SB RAS), Biysk 659322, Russia*

*\*Correspondence. E-mail: shchurova\_irina@mail.ru*

## **Table of contents**

|                                                              |    |
|--------------------------------------------------------------|----|
| <sup>1</sup> H and <sup>13</sup> C NMR of compound <b>2b</b> | S2 |
| <sup>1</sup> H and <sup>13</sup> C NMR of compound <b>2c</b> | S3 |
| <sup>1</sup> H and <sup>13</sup> C NMR of compound <b>2d</b> | S4 |
| <sup>1</sup> H and <sup>13</sup> C NMR of compound <b>3b</b> | S5 |
| <sup>1</sup> H and <sup>13</sup> C NMR of compound <b>3c</b> | S6 |
| <sup>1</sup> H and <sup>13</sup> C NMR of compound <b>3d</b> | S7 |
| <sup>1</sup> H and <sup>13</sup> C NMR of compound <b>4</b>  | S8 |

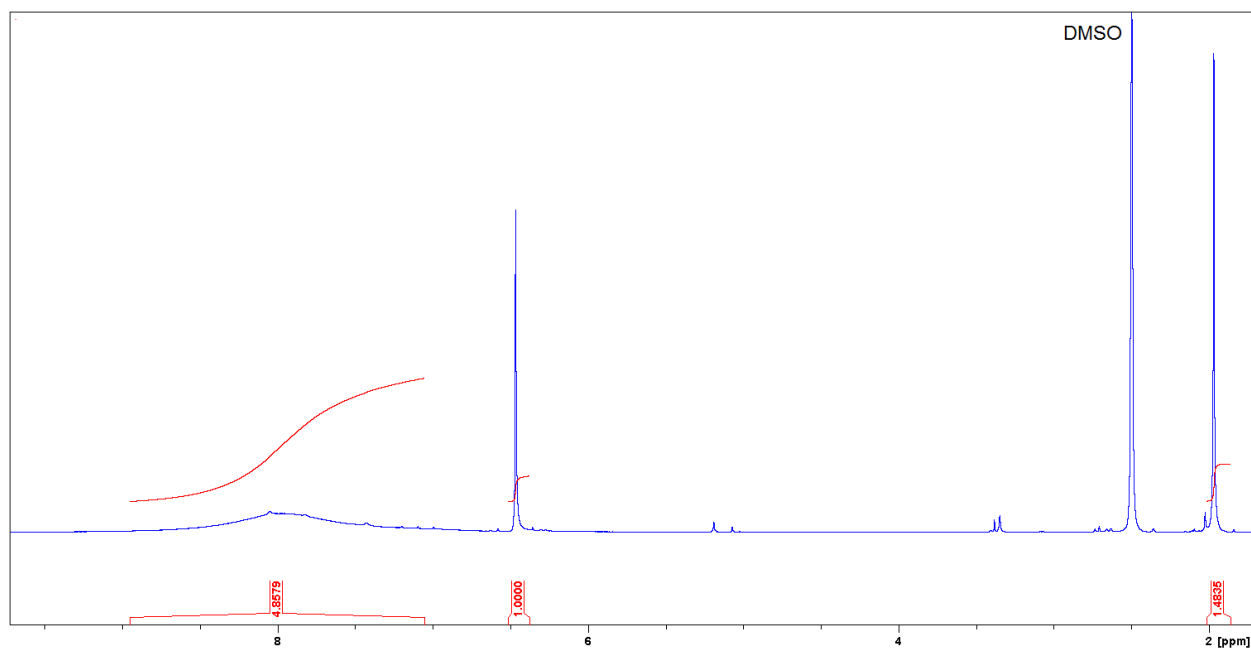

**Figure S1.**  $^1\text{H}$  NMR (DMSO- $\text{d}_6$ ) spectrum of compound **2b**

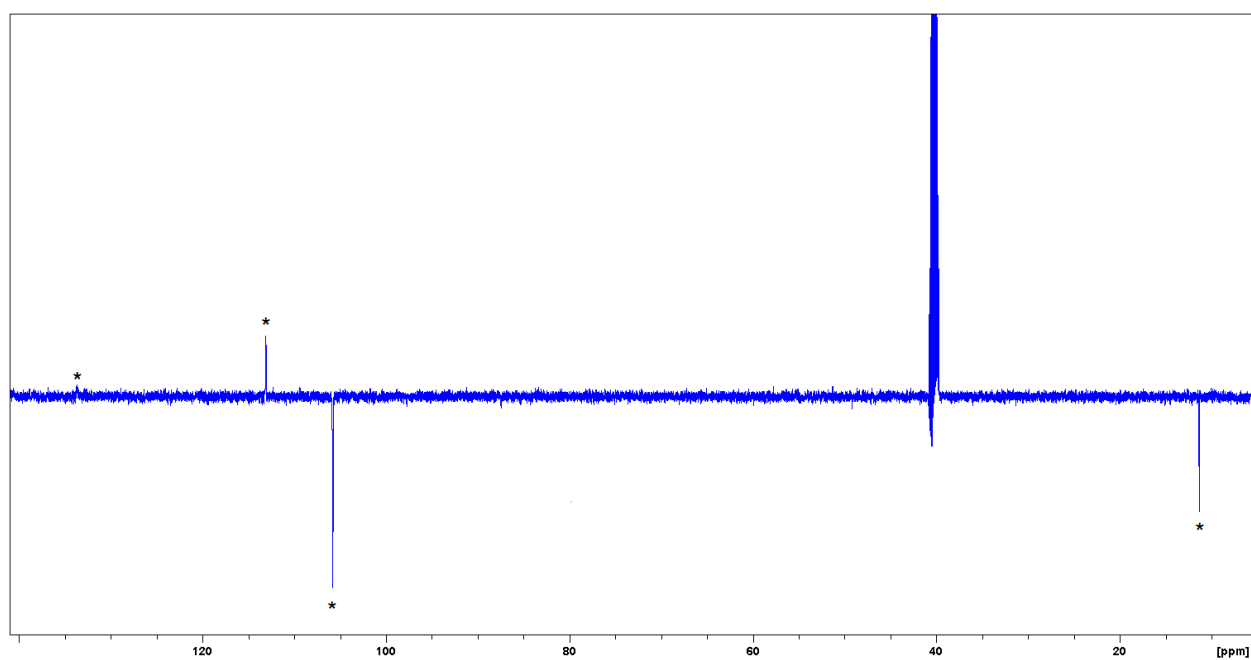

**Figure S2.**  $^{13}\text{C}$  NMR (DMSO- $\text{d}_6$ ) spectrum of compound **2b**

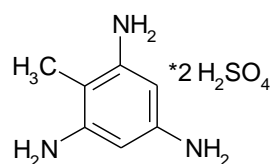

**2,4,6-Triaminotoluene disulfate (2b)**

$^1\text{H}$  NMR (500 MHz, DMSO- $\text{d}_6$ )  $\delta_{\text{H}}$  ppm: 1.97 (s, 3H,  $\text{CH}_3$ ), 6.47 (s, 2H, CH), 7.95 (bs, NH).

$^{13}\text{C}$  NMR (125 MHz, DMSO- $\text{d}_6$ )  $\delta_{\text{C}}$  ppm: 11.4, 105.8, 113.1, 133.7.

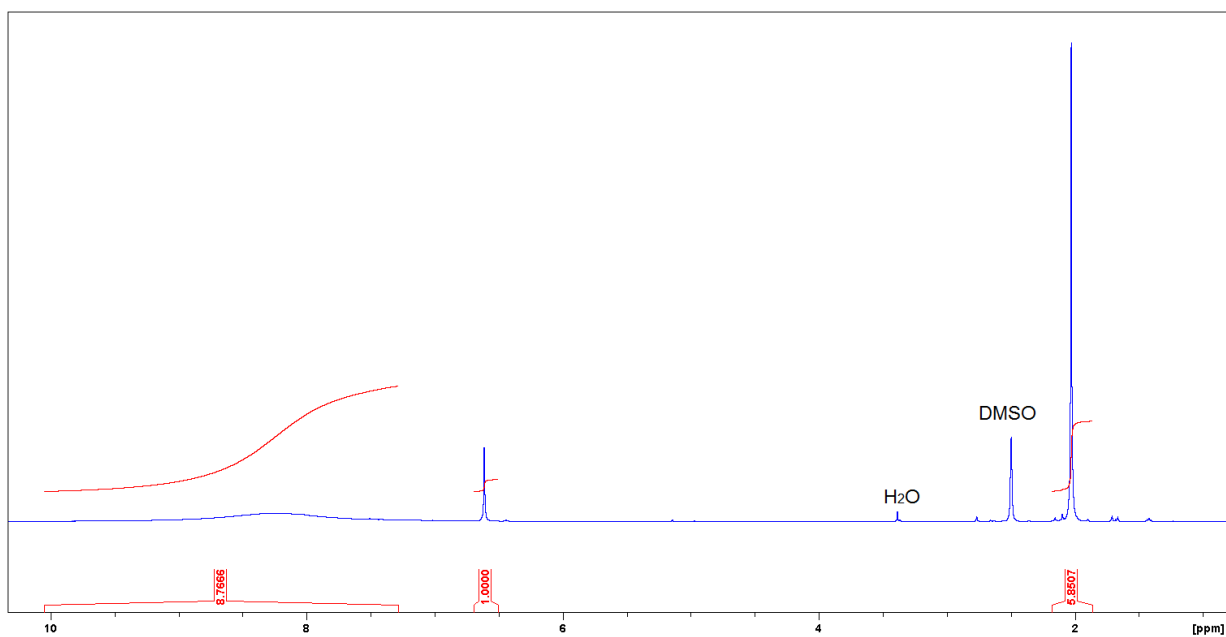

**Figure S3.**  $^1\text{H}$  NMR (DMSO- $\text{d}_6$ ) spectrum of compound **2c**

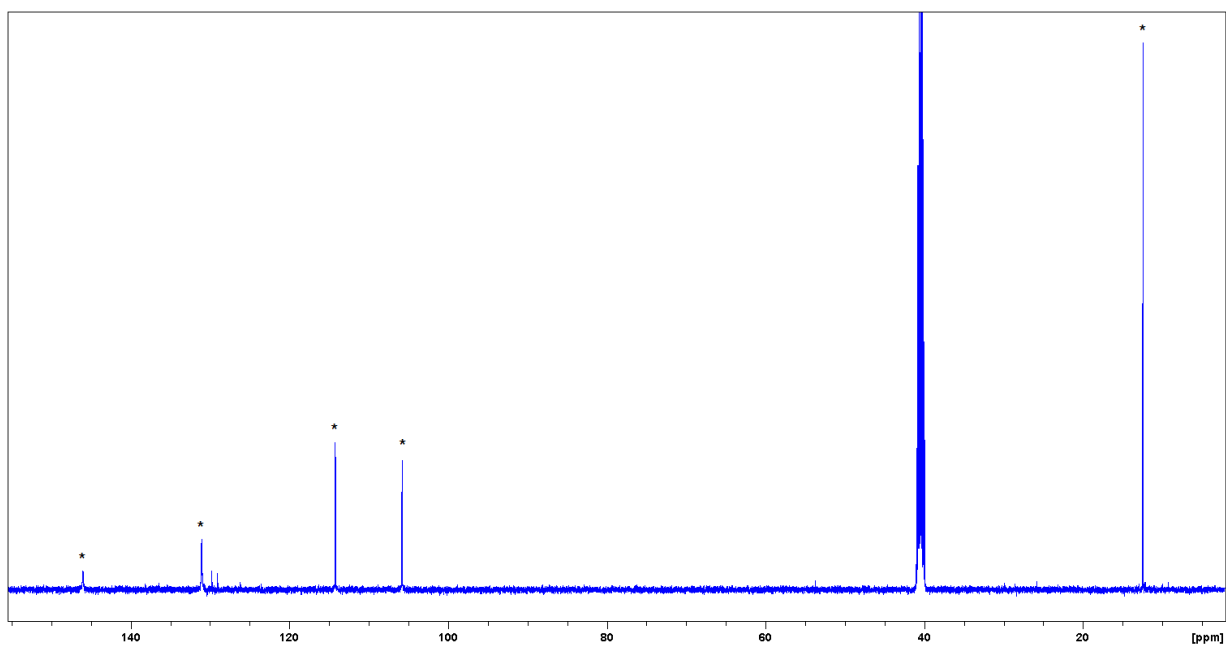

**Figure S4.**  $^{13}\text{C}$  NMR (DMSO- $\text{d}_6$ ) spectrum of compound **2c**

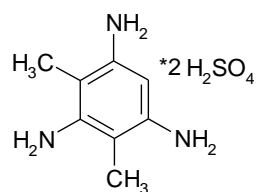

#### 2,4,6-Triaminoxylene disulfate (**2c**)

$^1\text{H}$  NMR (500 MHz, DMSO- $\text{d}_6$ )  $\delta_{\text{H}}$  ppm: 2.03 (s, 6H,  $\text{CH}_3$ ), 6.61 (s, 1H, CH), 8.25 (bs, NH).

$^{13}\text{C}$  NMR (125 MHz, DMSO- $\text{d}_6$ )  $\delta_{\text{C}}$  ppm: 12.5, 105.8, 114.2, 131.1, 146.1.

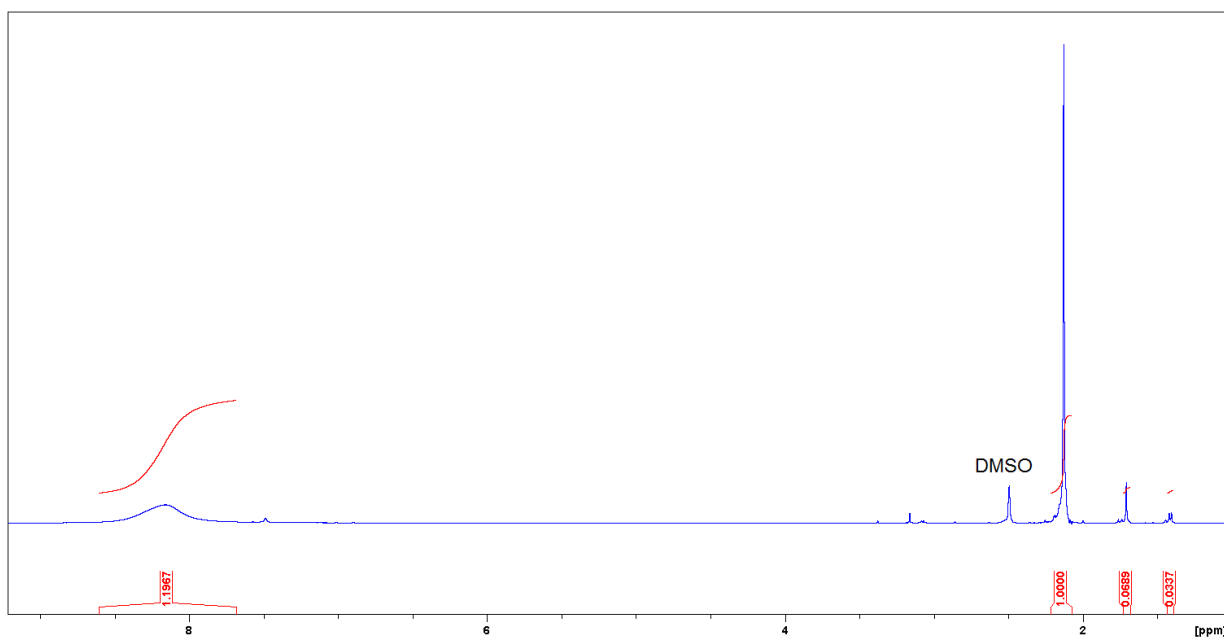

**Figure S5.**  $^1\text{H}$  NMR (DMSO- $\text{d}_6$ ) spectrum of compound **2d**

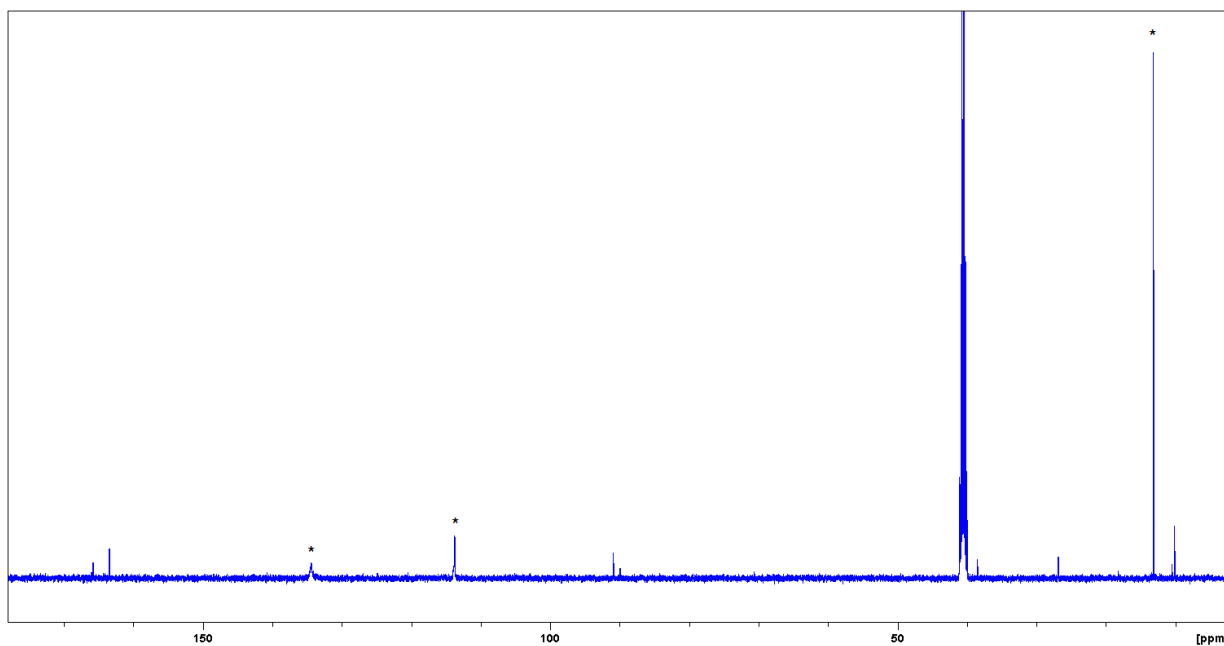

**Figure S6.**  $^{13}\text{C}$  NMR (DMSO- $\text{d}_6$ ) spectrum of compound **2d**

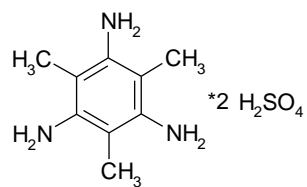

**2,4,6-Triaminomesitylene disulfate (2d)**

$^1\text{H}$  NMR (500 MHz, DMSO- $\text{d}_6$ )  $\delta_{\text{H}}$  ppm: 2.13 (s, 9H,  $\text{CH}_3$ ), 8.17 (bs, NH).

$^{13}\text{C}$  NMR (125 MHz, DMSO- $\text{d}_6$ )  $\delta_{\text{C}}$  ppm: 13.1, 113.7, 134.4.

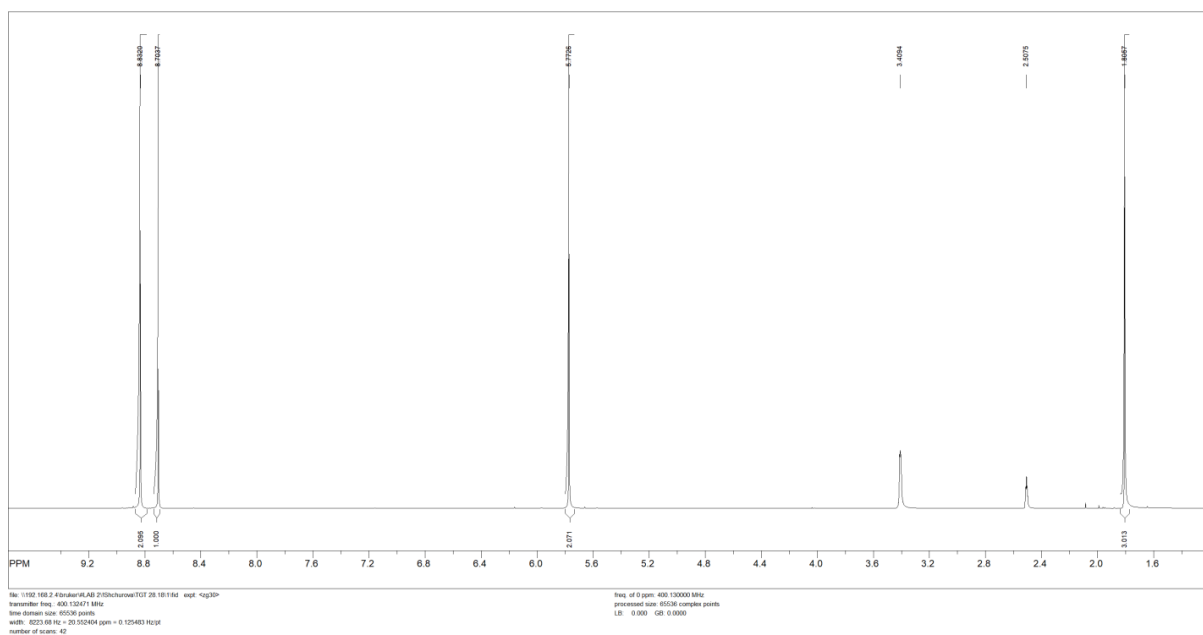

**Figure S7.**  $^1\text{H}$  NMR ( $\text{DMSO-d}_6$ ) spectrum of compound **3b**

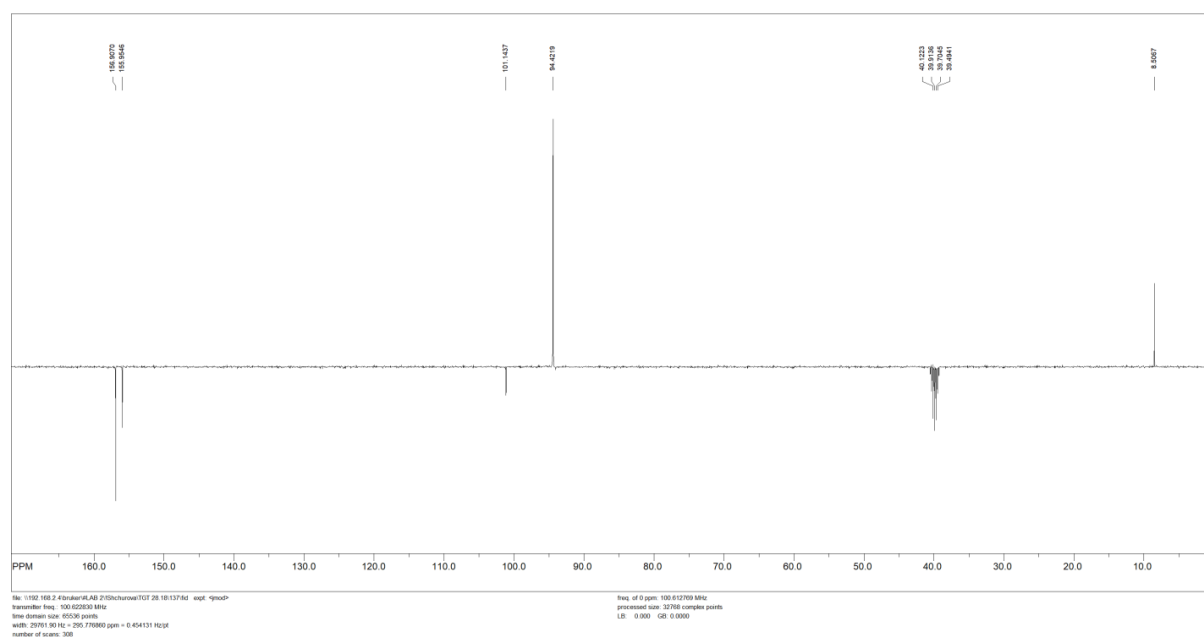

**Figure S8.**  $^{13}\text{C}$  NMR ( $\text{DMSO-d}_6$ ) spectrum of compound **3b**

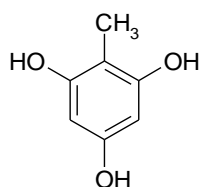

## 2-Methyl phloroglucinol (3b)

**$^1\text{H}$  NMR** (400 MHz,  $\text{DMSO-d}_6$ )  $\delta_{\text{H}}$  ppm: 1.81 (s, 3H, CH<sub>3</sub>), 5.77 (s, 2H, Ar), 8.70 (s, 1H, OH), 8.83 (s, 2H, OH).

**$^{13}\text{C}$  NMR** (100 MHz,  $\text{DMSO-d}_6$ )  $\delta_{\text{C}}$  ppm: 8.5, 94.4, 101.1, 156.0, 156.9.

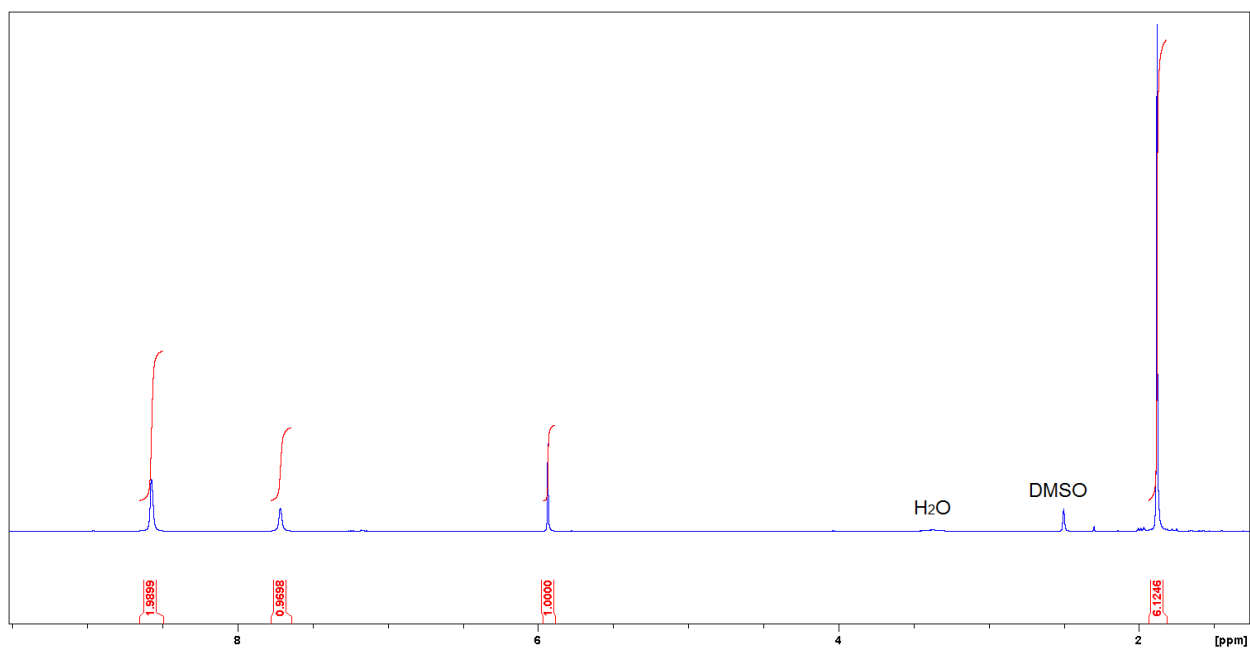

**Figure S9.**  $^1\text{H}$  NMR (DMSO- $\text{d}_6$ ) spectrum of compound **3c**

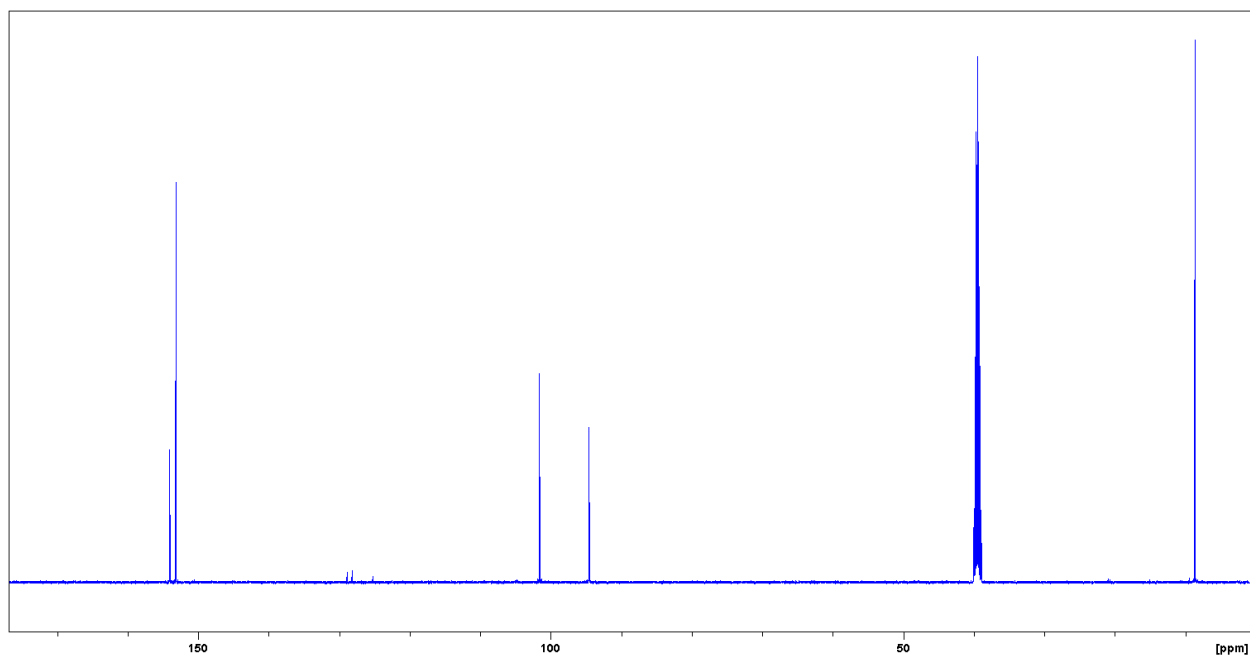

**Figure S10.**  $^{13}\text{C}$  NMR (DMSO- $\text{d}_6$ ) spectrum of compound **3c**

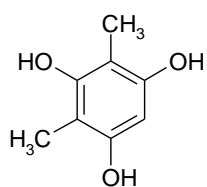

### 2,4-Dimethyl phloroglucinol (**3c**)

$^1\text{H}$  NMR (500 MHz, DMSO- $\text{d}_6$ )  $\delta_{\text{H}}$  ppm: 1.88 (s, 6H,  $\text{CH}_3$ ), 5.93 (s, 1H, Ar), 7.72 (s, 1H, OH), 8.58 (s, 2H, OH).

$^{13}\text{C}$  NMR (125 MHz, DMSO- $\text{d}_6$ )  $\delta_{\text{C}}$  ppm: 8.7, 94.6, 101.6, 153.2, 154.1.

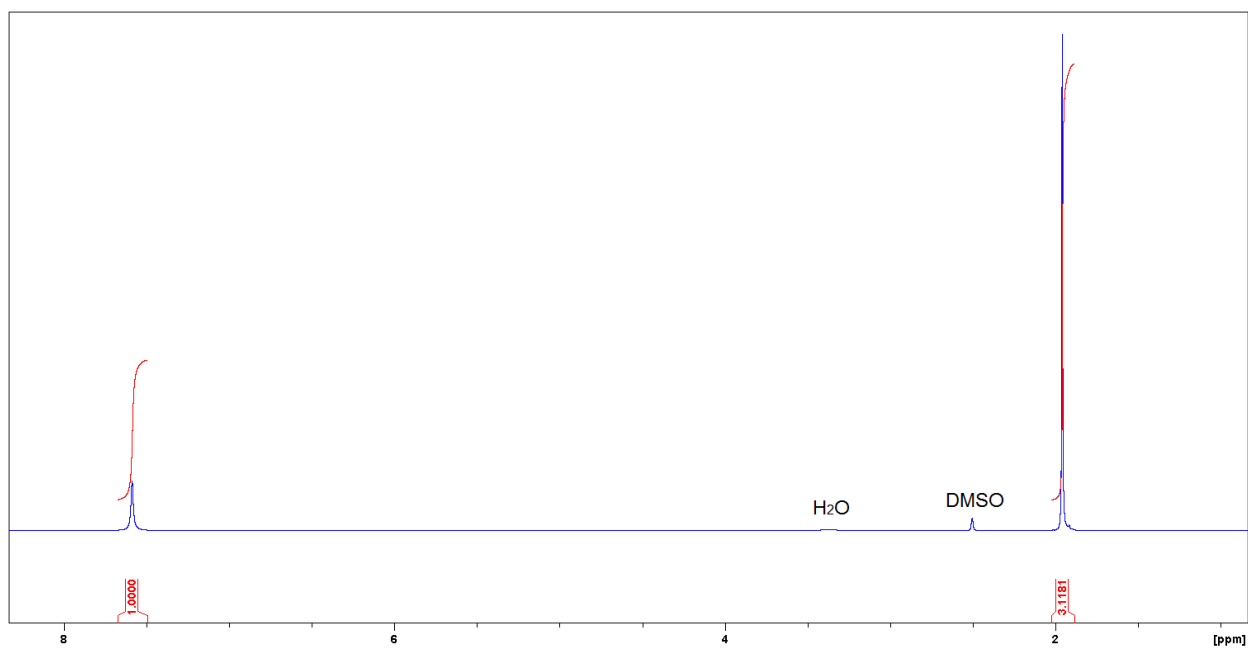

**Figure S11.**  $^1\text{H}$  NMR (DMSO- $\text{d}_6$ ) spectrum of compound **3d**

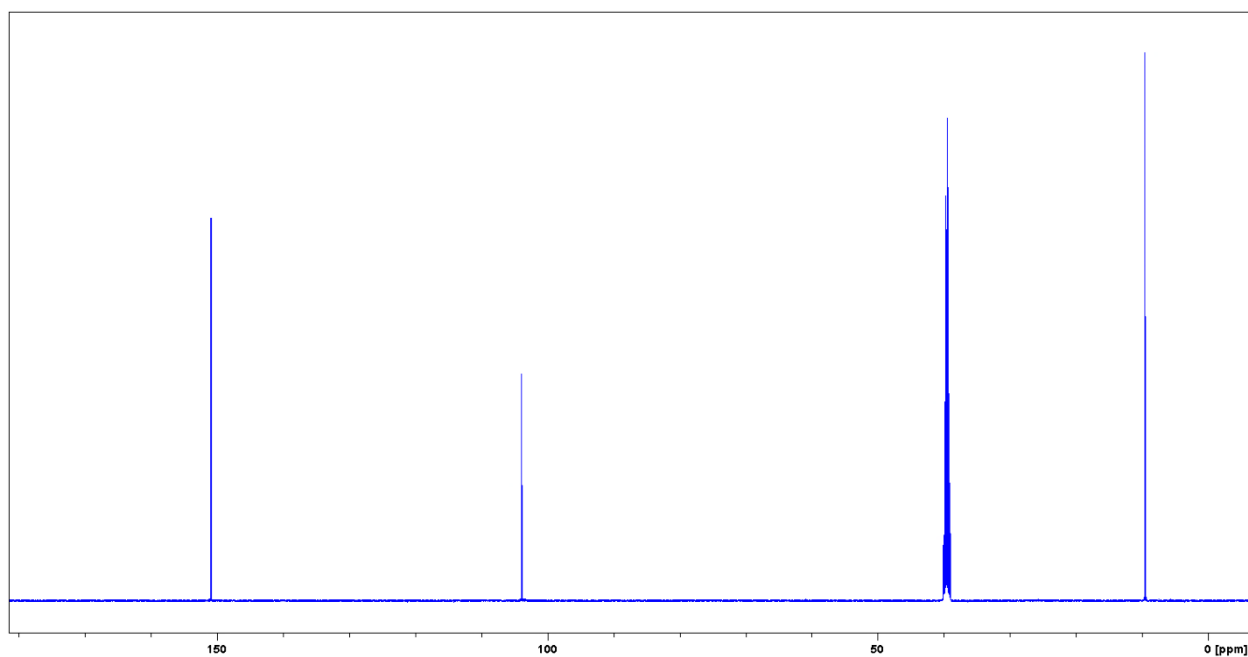

**Figure S12.**  $^{13}\text{C}$  NMR (DMSO- $\text{d}_6$ ) spectrum of compound **3d**

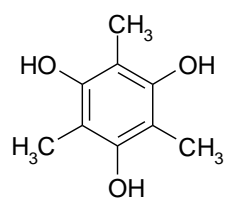

**2,4,6-Trimethyl phloroglucinol (3d)**

$^1\text{H}$  NMR (500 MHz, DMSO- $\text{d}_6$ )  $\delta_{\text{H}}$  ppm: 1.95 (s, 9H,  $\text{CH}_3$ ), 7.59 (s, 3H, OH).

$^{13}\text{C}$  NMR (125 MHz, DMSO- $\text{d}_6$ )  $\delta_{\text{C}}$  ppm: 9.5, 103.9, 150.9.

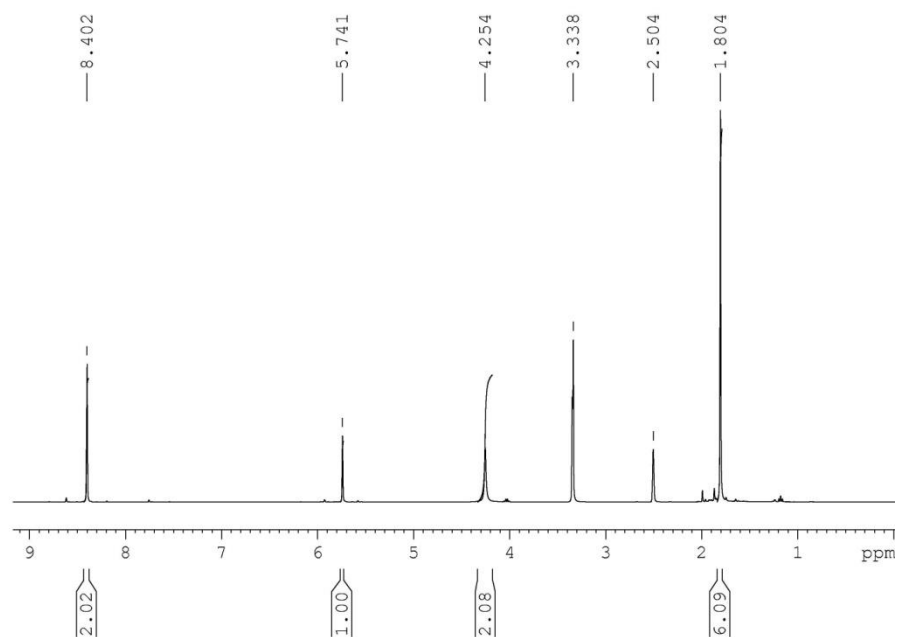

**Figure S13.**  $^1\text{H}$  NMR (DMSO- $\text{d}_6$ ) spectrum of compound **4**

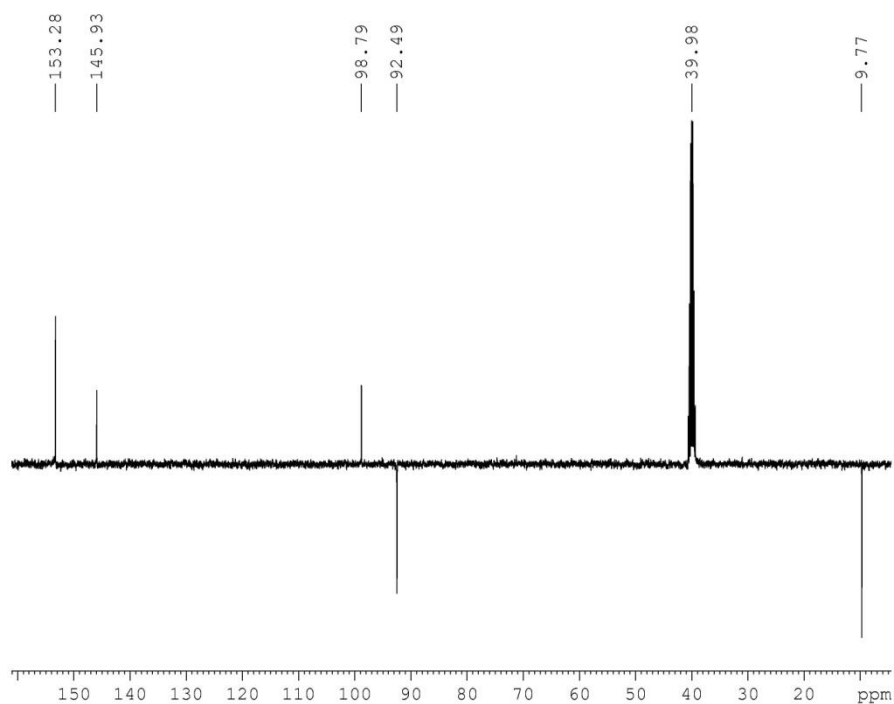

**Figure S14.**  $^{13}\text{C}$  NMR (DMSO- $\text{d}_6$ ) spectrum of compound **4**

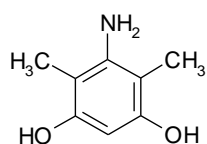

**2-Amino-4,6-dimethylphloroglucinol (4)**

$^1\text{H}$  NMR (400 MHz, DMSO- $\text{d}_6$ ):  $\delta_{\text{H}}$  ppm: 1.80 (s, 6 H,  $\text{CH}_3$ ), 4.25 (s, 2 H,  $\text{NH}_2$ ), 5.74 (s, 1 H, Ar-H), 8.40 (s, 2 H, OH).

$^{13}\text{C}$  NMR (125 MHz, DMSO- $\text{d}_6$ ):  $\delta_{\text{C}}$  ppm: 9.8, 94.5, 98.8, 145.9, 153.3.
